# Supplementary material for: Novel double-chained or double-layered metal diphosphonates: synergic coordination effect of two closely linked phosphonate moieties promoted by large metal ionic radius
Source: Royal Society of Chemistry journal article supplement (doi:10.1039/b921440b), 2010-01-01
Supplement: b921440b.pdf [file b921440b.pdf]

## Supporting Materials

# Novel Double-chained or Double-layered Metal Diphosphonates: Synergic Coordination Effect of Two Closely Linked Phosphonate Moieties Promoted by Large Metal Ionic Radius

Zi-Yi Du,\* Yu-Hui Sun, Xiu-Zhi Zhang, Shu-Fen Luo, Yong-Rong Xie and Dong-Bei Wan

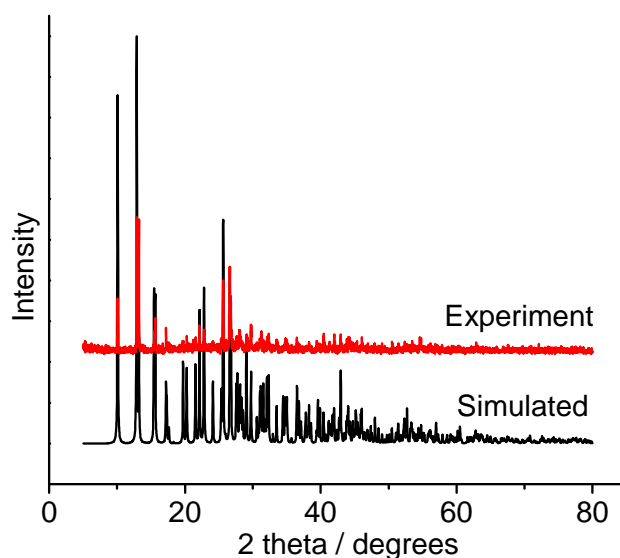

**Fig. S1** Simulated and experimental XRD powder patterns for compound **1**.

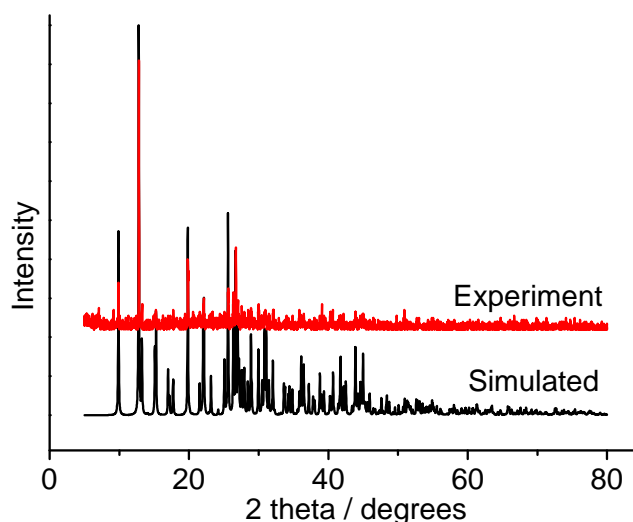

**Fig. S2** Simulated and experimental XRD powder patterns for compound **2**.
